# Supplementary material for: High throughput discovery of influenza virus neutralizing antibodies from phage-displayed synthetic antibody libraries
Source: PubMed Central journal article supplement (PMC5663709; doi:10.1038/s41598-017-14823-w), 2017-10-31
Supplement: 41598_2017_14823_MOESM1_ESM.pdf [file 41598_2017_14823_MOESM1_ESM.pdf]

## Supplementary information

### **High throughput discovery of influenza virus neutralizing antibodies from phage-displayed synthetic antibody libraries**

Ing-Chien Chen<sup>1,+</sup>, Yi-Kai Chiu<sup>1,+</sup>, Chung-Ming Yu<sup>1</sup>, Cheng-Chung Lee<sup>2</sup>, Chao-Ping Tung<sup>1</sup>, Yueh-Liang Tsou<sup>1</sup>, Yi-Jen Huang<sup>1</sup>, Chia-Lung Lin<sup>1</sup>, Hong-Sen Chen<sup>1</sup>, Andrew H.-J. Wang<sup>2</sup>, An-Suei Yang<sup>1,\*</sup>

<sup>1</sup> Genomics Research Center, Academia Sinica, Taipei, Taiwan 115.

<sup>2</sup> Institute of Biological Chemistry, Academia Sinica, Taipei, Taiwan 115.

\*Correspondence and requests for materials should be addressed to A.S.Y. (email: [yangas@gate.sinica.edu.tw](mailto:yangas@gate.sinica.edu.tw)). Genomics Research Center, Academia Sinica, 128 Academia Rd., Sec.2, Nankang Dist., Taipei, Taiwan 115. Phone: +886-2-2787-1232.

<sup>+</sup> These authors contribute equally to this work.

## **Inventory of Supplemental Information**

### **Supplementary Methods**

**Generic Human (GH) synthetic antibody library construction**

### **Supplementary Figure**

**Supplementary Figure S1. Sequence preferences determined with NGS for the VH designed positions at different panning stage against HER2 for the selected scFv libraries.**

**Supplementary Figure S2. Results of pseudo virus-based microneutralization assay for the IgGs that did not shown neutralization activity.**

**Supplementary Figure S3. SDS-PAGE analysis of purified IgGs.**

### **Supplementary Tables**

**Supplementary Table S1. Primers for diversifying CDR-L1, L2, L3, H1, H2 in GH2-5~24 antibody libraries.**

**Supplementary Table S2. Summary of CDR-H3 designs for GH2-5~24 phage-displayed synthetic scFv libraries.**

**Supplementary Table S3. CDR sequences of anti-influenza IgGs derived from synthetic antibody libraries**

**Supplementary Table S4. Protein expression, epitope grouping and assessment of the neutralizing and binding potencies of anti-influenza IgGs derived from synthetic antibody libraries**

**Supplementary Table S5. Crystallography parameters for the S40-HA complex structure**

### **References**

## Supplementary Methods

### ***Generic Human (GH) synthetic antibody library construction***

*scFv template preparation:* The framework sequence of GH2-5~24 scFv libraries is based on the human IGKV1-NL1\*01/IGHV3-23\*04 germline sequence and cloned into pCANTAB5E (GE Healthcare) phagemid via *Sfi*I and *Not*I restriction sites. TAA stop codons were introduced in CDRs to ensure that only the phagemids carrying the mutagenic oligonucleotides would produce pIII fusion scFv on phage surface.

*Primer design and heavy chain/light chain variable domain library construction:* A phage displayed library for each of the GH2-5~24 libraries' light and heavy chain was constructed based on the oligonucleotide-directed mutagenesis procedure <sup>1</sup>. Positions were mutagenized using synthesized oligonucleotides with the following degenerate codons to produce equal molar ratio of designed amino acids: Trp/Gly ([T/G]GG), Phe/Ser/Tyr (T[T/C/A][C/T], Gly/Asp/Ser/Gln ([G/A][G/A][C/T]), Gly/Ala/Ser/Thr/Arg/Pro ([G/A/C][G/C][T/C]), Ala/Thr/Pro/Ser ([A/G/T/C]C[A/G/T/C]), Phe/Tyr/Asp/Val/Asn/Ile/His/Leu ([A/G/T/C][A/T][T/C]), and Leu/Ile/Val/Phe/Met ([A/G/T/C]T[A/G/T/C]) (Supplementary Table S1 and S2). For the light chain repertoires, CDR-L1, -L2 and -L3 were diversified with the mutagenic oligonucleotides shown in Supplementary Table S1 on the basis of the template V3a-LC TAA <sup>2</sup>. For the heavy chain repertoires, CDR-H1, -H2 and -H3 were diversified with the mutagenic oligonucleotides shown in Supplementary Table S1 (CDR-H1 and -H2) and Supplementary Table S2 (CDR-H3) on the basis of the template V3c-HC TAA <sup>2</sup>. In brief, mutagenic oligonucleotides for each CDR were mixed and phosphorylated by T4 polynucleotide kinase (New England BioLabs) in 70 mM Tris-HCl (pH 7.6), 10 mM MgCl<sub>2</sub>, 1 mM ATP and 5 mM dithiothreitol (DTT) at 37°C for 1 h. The phosphorylated oligonucleotides were then annealed to uracilated single-

stranded DNA template, at a molar ratio of 3:1 (oligonucleotide:ssDNA), by heating the mixture at 90 °C for 2 min, followed by a temperature decrease of 1°C/min to 20 °C in a thermal cycler. Subsequently, the template-primer annealing mixture was incubated in 0.32 mM ATP, 0.8 mM dNTPs, 5 mM DTT, 600 units of T4 DNA ligase, and 75 units of T7 DNA polymerase (New England BioLabs) to prime *in vitro* DNA synthesis. After overnight incubation at 20 °C, the synthesized dsDNA was desalted and concentrated by a centrifugal filter (Amicon® Ultra 0.5 mL 30K device), then electroporated into *Escherichia coli* ER2738 at 3000 V with an electroporator. Typically, 1 µg of dU-ssDNA produced about 10<sup>7</sup>-10<sup>8</sup> recombinant phage variants, and 75–90% of the phage variants carried mutagenic oligonucleotides at the three CDR regions simultaneously.

*Protein A/L selection of functional scFv variants:* The rescued phage libraries of light- and heavy-chain were precipitated with 20% PEG/NaCl and resuspended in phosphate-buffered saline (PBS) for the following protein A/L selection process. First, NUNC 96-well Maxisorb immunoplates were coated overnight at 4 °C with Protein A (for selection of heavy chain-diversified libraries) or Protein L (for selection of light chain-diversified libraries) (1 µg/100 µL PBS per well) and blocked with 5% skim milk in PBST for 1h. After blocking, 100 µL of resuspended phage library (10<sup>13</sup> cfu/mL) was added to each well for 1 h under gentle shaking. The plate was washed 12 times with 200 µL PBST [0.05% (v/v) Tween 20] and 2 times with 200 µL PBS. The bound phages were eluted with 100 µL of 0.1 M HCl/glycine (pH 2.2) per well, followed by neutralization with 8 µL of 2 M Tris-base buffer (pH 9.1). The eluted phages were mixed with 1 mL of *E. coli* strain ER2738 ( $A_{600\text{ nm}} = 0.6$ ) for 15 min at 37 °C. Infected *E. coli* was titered, and amplified with 50 mL of 2 X YT containing 100 µg/mL

ampicillin at 37 °C overnight. After centrifugation, the bacterial pellet was resuspended and its phagemid DNA was extracted.

*Combination of functional scFv variants into the generic human (GH) antibody libraries:* Each of the GH2-5~24 libraries was assembled in scFv format as previously described with some modification<sup>3</sup>. In the first PCR, two variable domains VL and VH were amplified separately from light- and heavy-chain library after selection for binding to Protein A/L by using the primers *V<sub>L</sub>for* (5'-GGGCCCAGCCGGCCATGGCCGATATTCAAATGACCCAGAGCCCGAGC-3') with *V<sub>L</sub>rev* (5'-GGAAGATCTAGAGGAACCACCGCGTTTGATTTCCACTTTGGTGCCTTGACC-3') and *V<sub>H</sub>for* (5'-GGTGGTTCCTCTAGATCTTCCTCCTCTGGTGGCGGTGGCTCGGGCGGTGGTGGGGAAGTGCAGCTGGTGGAAATCGGG -3') with *V<sub>H</sub>rev* (5'-CCTGCCTGCGGCCGCTGACGCCGAGC -3'), respectively (linker sequence is underlined). PCR reactions were performed in a volume of 50 µL using KOD Hot Start polymerase (Novagen), 100 ng DNA template and 0.3 µM of each primer for 25 cycles (30 sec 95°C, 30 sec 65°C, 1 min 72°C) followed a 10 min final synthesis step. The PCR products were digested with *EcoRI* and then purified by agarose gel electrophoresis. In the second PCR, two variable domains were assembled using the overlapping primers (*SfiI* and *NotI* restriction sites are underlined): *Overlapfor* (5'-GAGGAGGAGGAGGAGGAGGCGGGGCCAGCCGGCCATGGCCGATATTC -3') with *Overlaprev* (5'-GAGGAGGAGGAGGAGGAGCCTGCCTGCGGCCGCTGACGCC -3'). 100 ng of the purified VL and VH PCR products of the first PCR were used in a a volume of 50 µL using MyTaq Hot Start polymerase (Bioline) and 0.3 µM of each primer for 30

cycles (30 sec 95°C, 30 sec 65°C, 1 min 30 sec 72°C) followed by a 10 min final synthesis step. The assembled VL-VH fragments were doubly digested with *Sfi*I and *Not*I (New England BioLabs) and cloned into pCANTAB5E phagemid vector. The resulting ligation product was electroporated into *Escherichia coli* ER2738 at 3000 V with an electroporator.

(A) CDR-H1

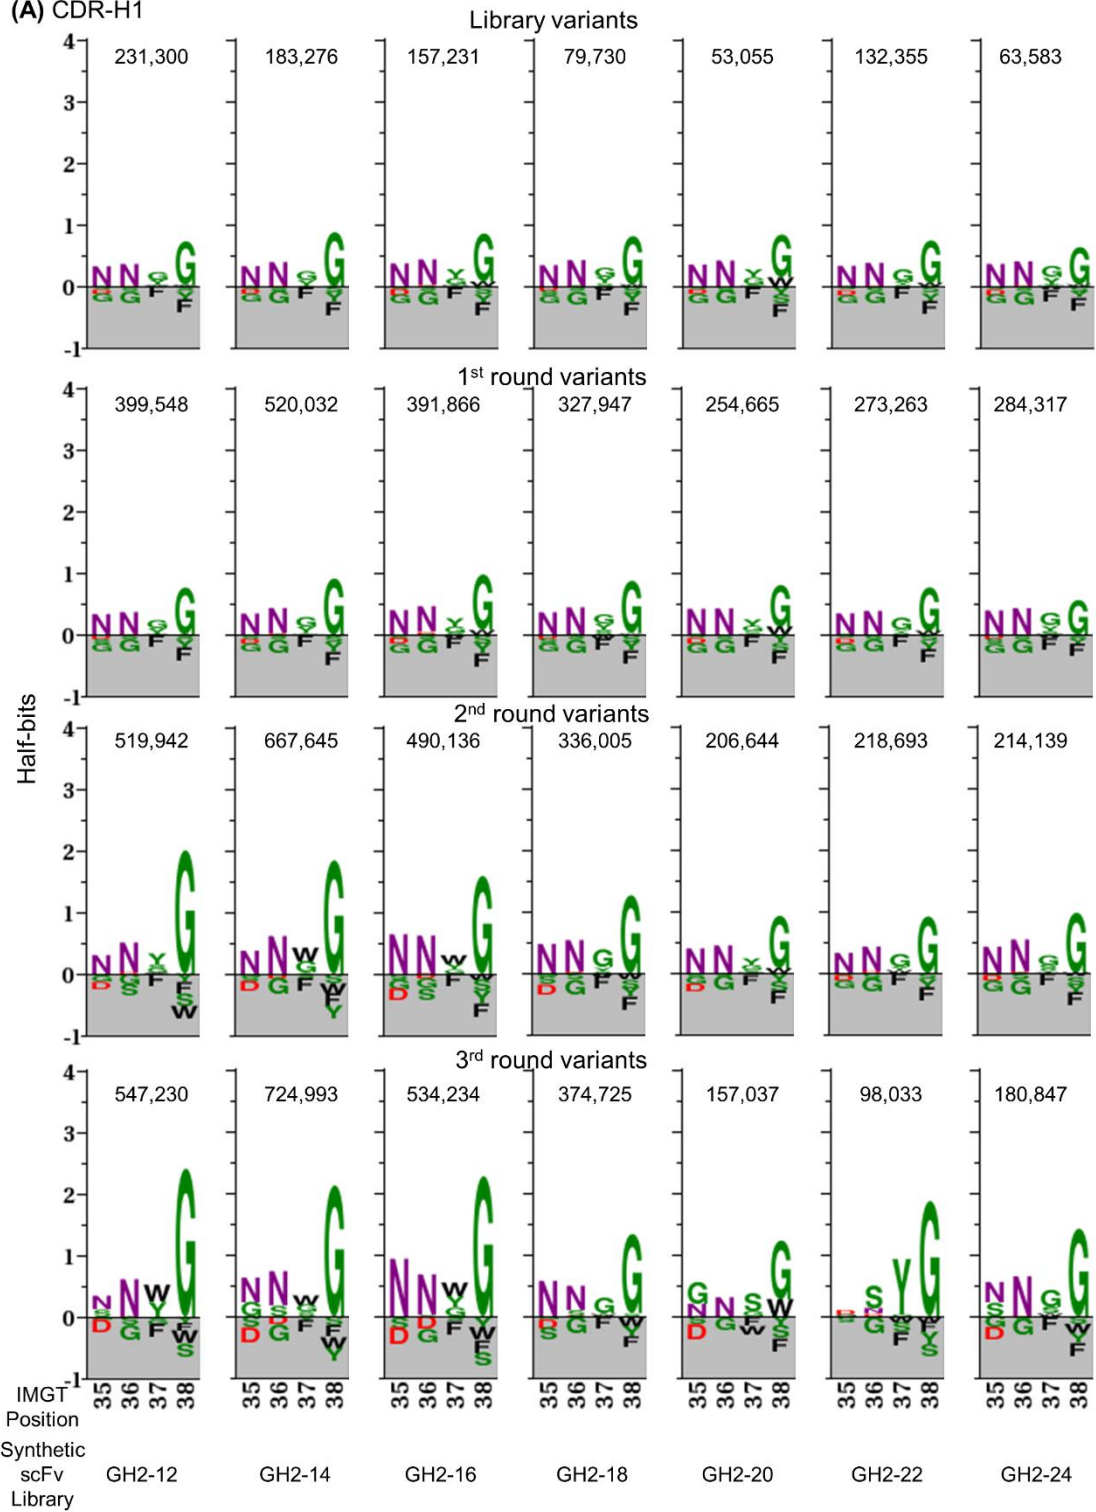

(B) CDR-H2

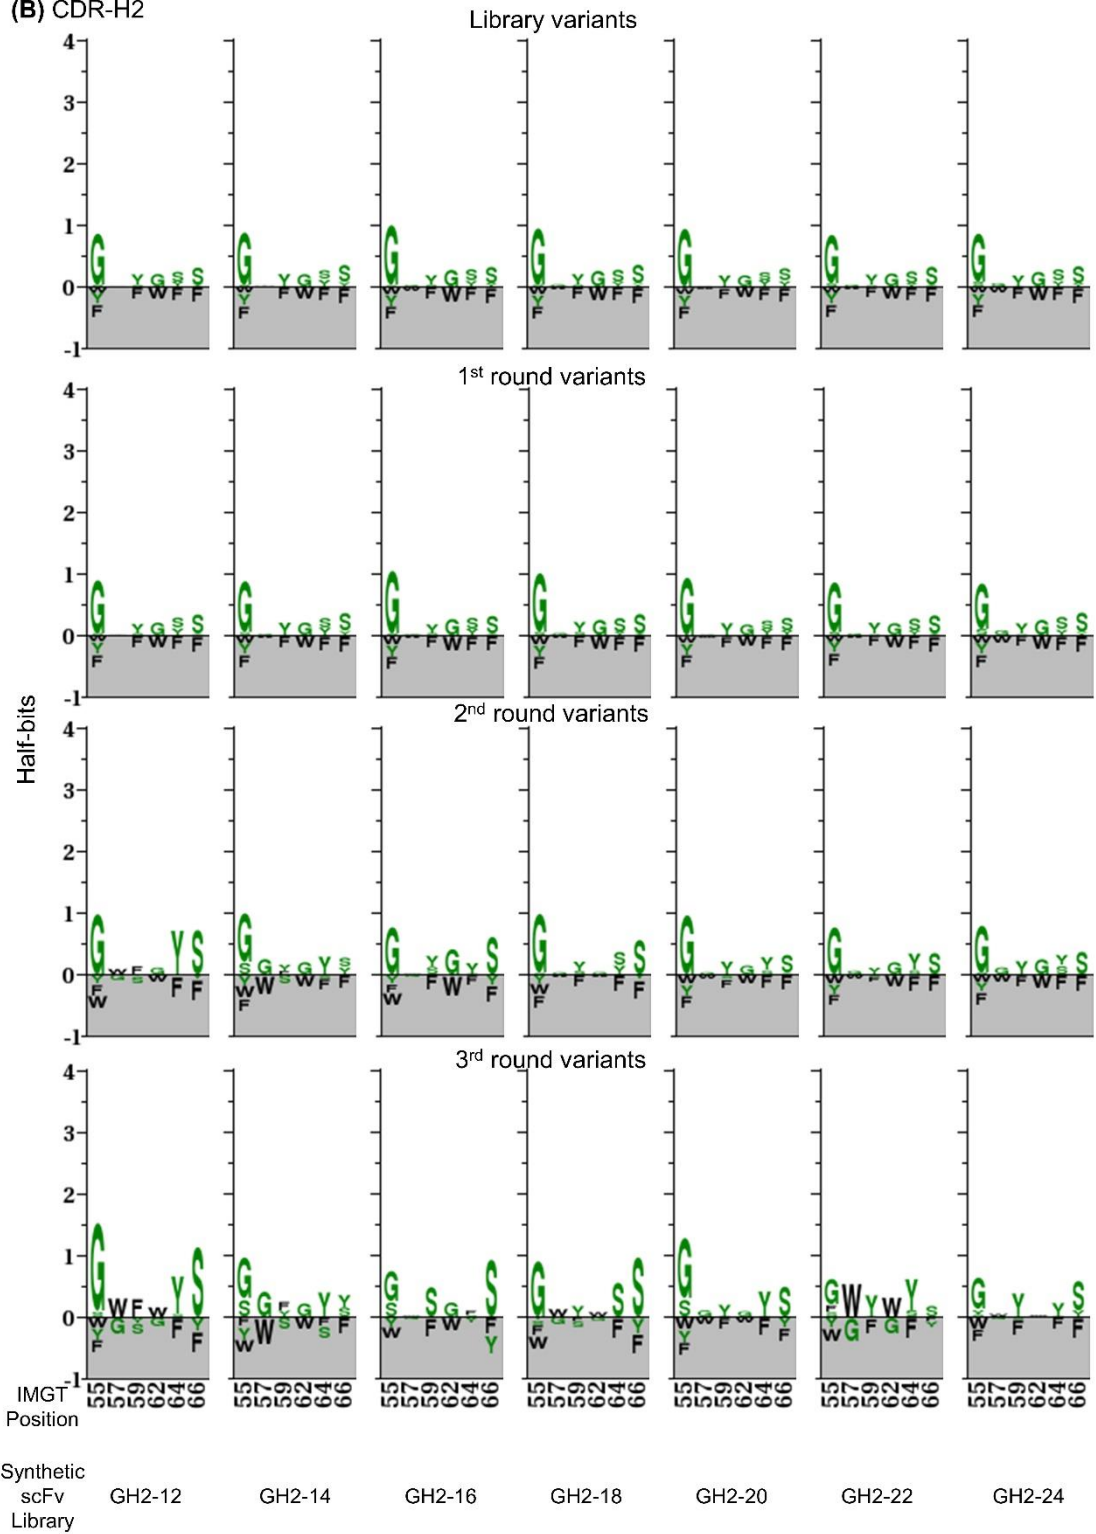



(C) CDR-H3

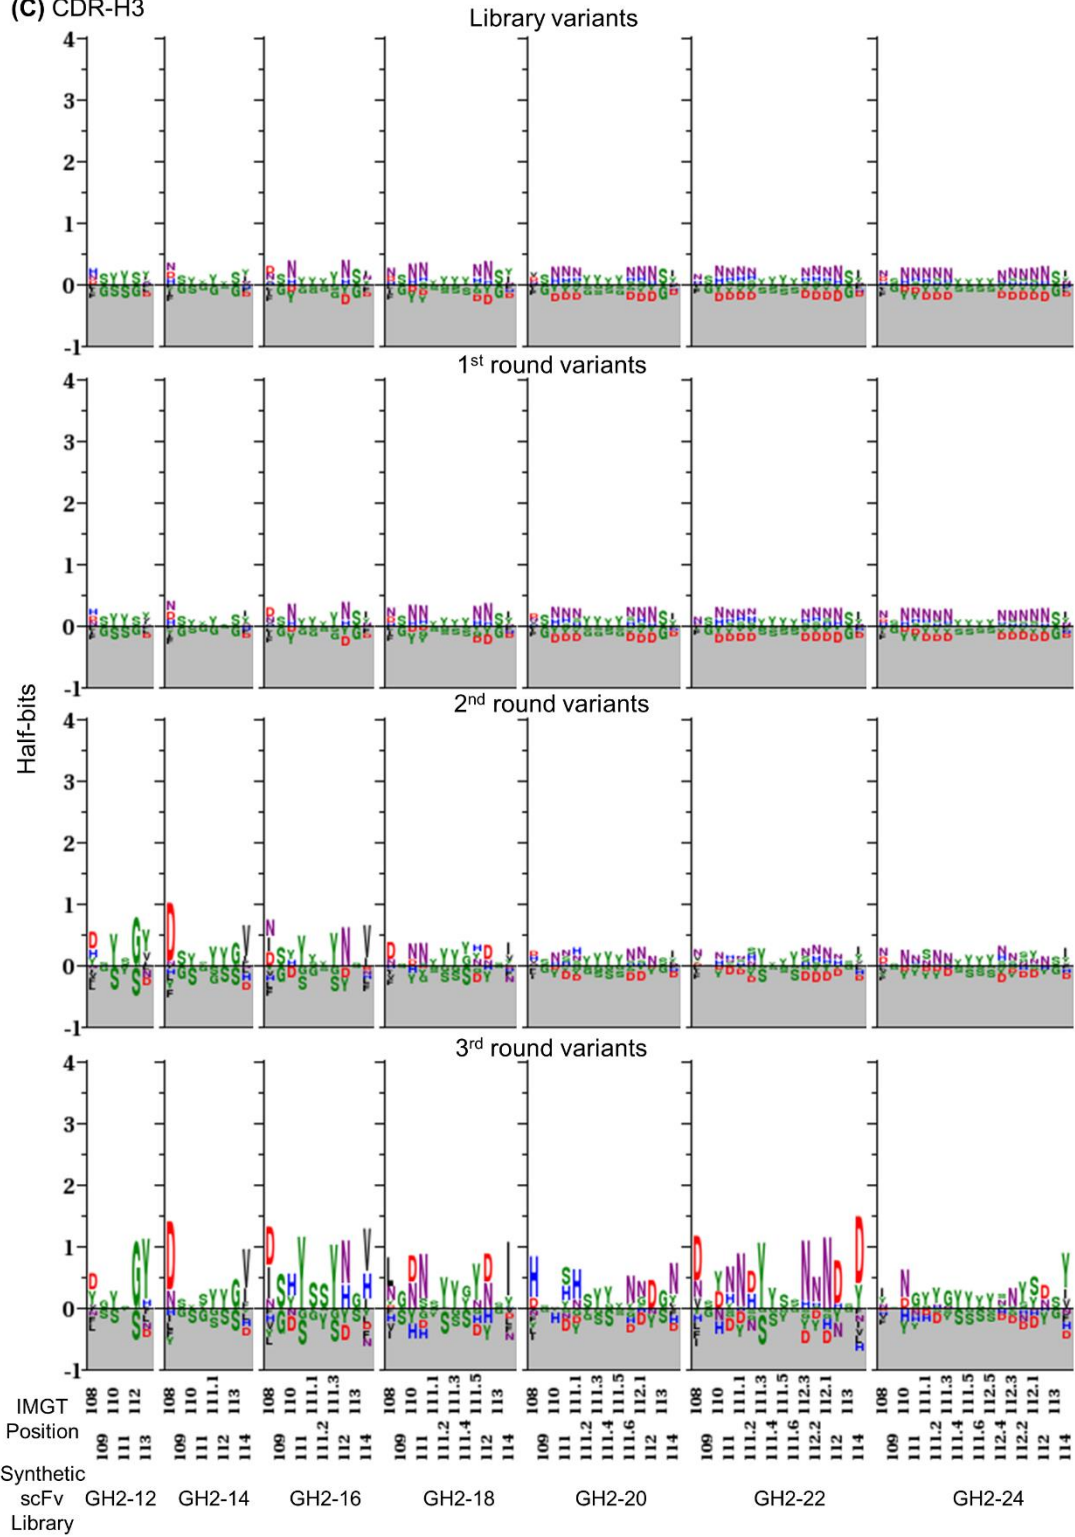

**Supplementary Figure S1. Sequence preferences determined with NGS for the VH designed positions at different panning stage against HER2 for the selected scFv libraries.** (A)~(C) Sequence preference of CDR-H1, CDR-H2, and CDR-H3 respectively. The scFv variants from initial designed library and 3 rounds panning against HER2/ECD are collected for high-throughput sequencing using Illumina MiSeq platform. The number of sequences derived for each group is shown on the top of sequence logo in (A). The calculation of sequence logo is described in previous publication <sup>4</sup>. The background frequency at each position is based on the design (See Supplementary Table S1<sup>2</sup> for CDR-H1 and CDR-H2 design details and Supplementary Table S2 for CDR-H3 design details). CDR position numbering follows IMGT numbering.

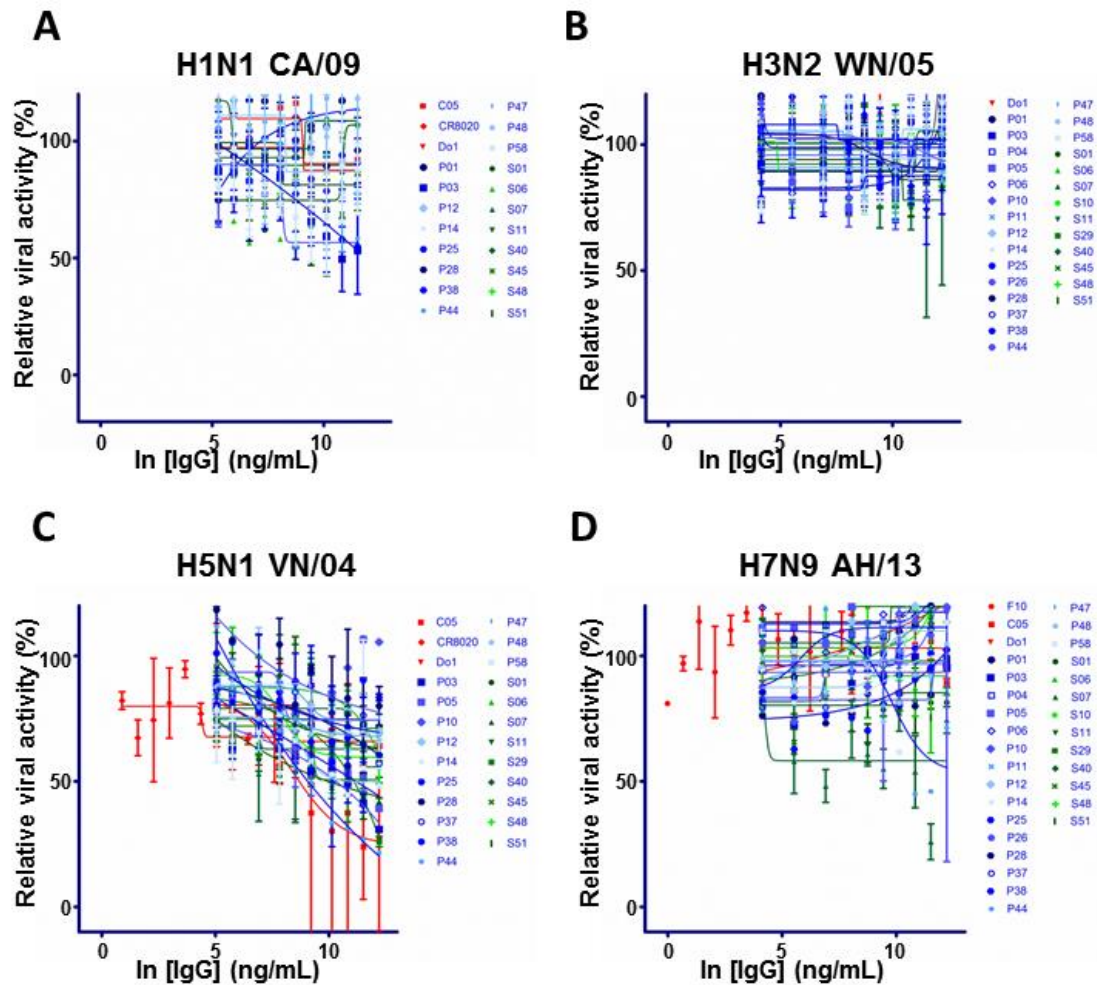

**Supplementary Figure S2. Results of pseudo virus-based microneutralization assay for the IgGs that did not shown neutralization activity. (A)~(D)** The IgGs were reformatted from the selected anti-HA trimer scFvs as shown in Fig. 3. The y-axis shows the relative viral activity plotted against the IgG concentration (x-axis). The experimental details are described in Methods. The CDR sequences of these IgGs are shown in Supplementary Table S3, and the numerical values of the  $IC_{50}$ 's are listed as  $>10^5$  ng/mL in Fig. 8 and Supplementary Table S4. The error bars associated with the data points are calculated with at least three independent repeats of the microneutralization assay.

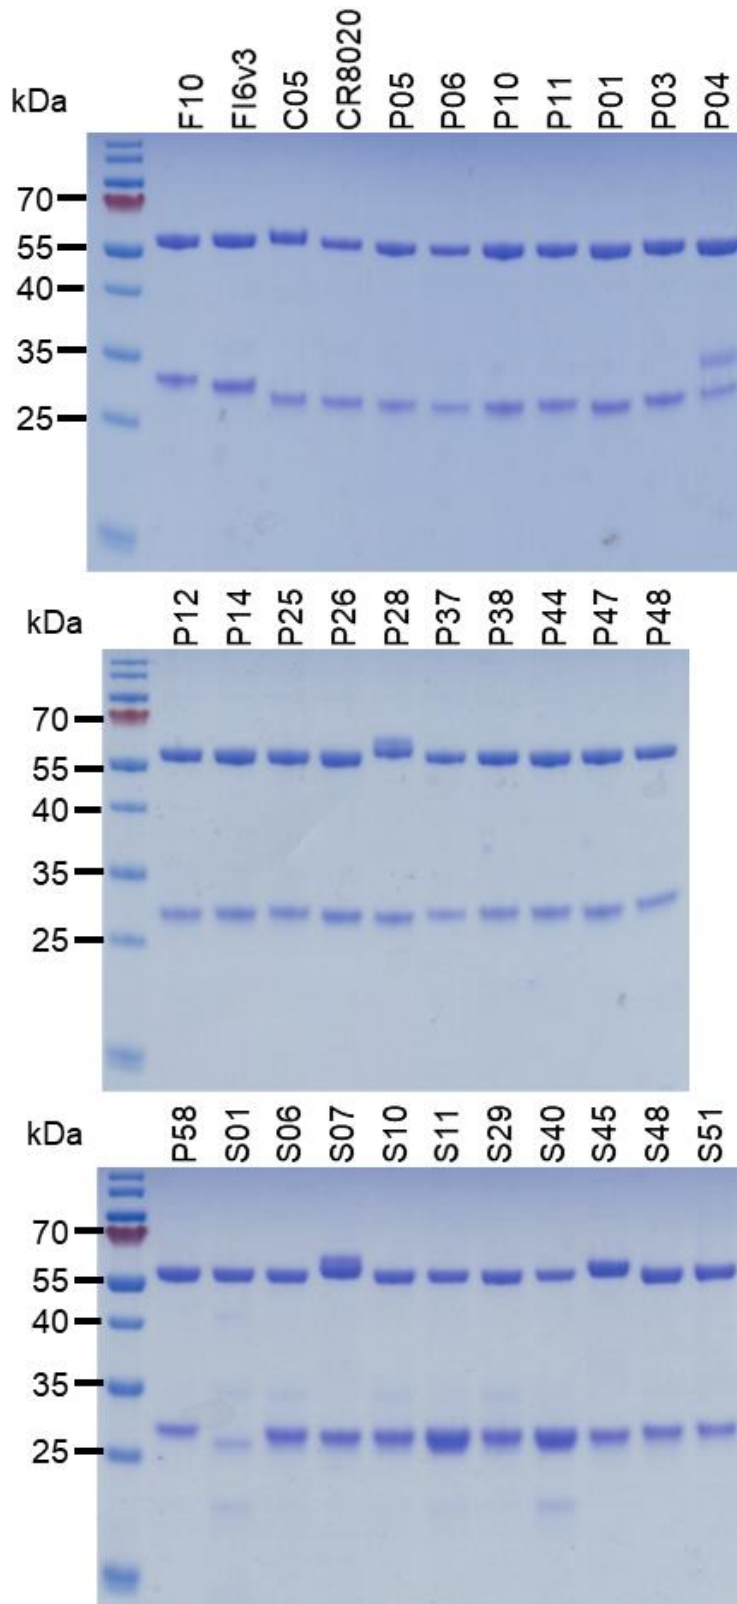

**Supplementary Figure S3. SDS-PAGE analysis of purified IgGs.** Two microgram of purified IgGs were analyzed by the SDS-PAGE under reducing condition. P04 is glycosylated in the CDR-L1, and P28, S07 and S45 are glycosylated in the CDR-H1.

**Supplementary Table S1. Primers for diversifying CDR-L1, L2, L3, H1, H2 in GH2-5~24 antibody libraries <sup>2</sup>.**

| Target CDRs | Primer | Sequences <sup>a</sup>                                                                           | Mutagenized residues <sup>b</sup> |     |     |     |     |     |  |  |  |
|-------------|--------|--------------------------------------------------------------------------------------------------|-----------------------------------|-----|-----|-----|-----|-----|--|--|--|
|             |        | GACCATTACCTGCCGTGCGAGCCAGGATG<br>TT <u>AGC ACG GCG</u><br>GTCGCATGGTATCAGCAGAAACCA               | S30                               | T31 | A32 |     |     |     |  |  |  |
|             | L101   | GACCATTACCTGCCGTGCGAGCCAGGATG<br>TT THY THY THY<br>GTCGCATGGTATCAGCAGAAACCA                      | b                                 | b   | b   |     |     |     |  |  |  |
|             | L102   | GACCATTACCTGCCGTGCGAGCCAGGATG<br>TT THY THY KGG<br>GTCGCATGGTATCAGCAGAAACCA                      | b                                 | b   | a   |     |     |     |  |  |  |
|             | L103   | GACCATTACCTGCCGTGCGAGCCAGGATG<br>TT THY KGG KGG<br>GTCGCATGGTATCAGCAGAAACCA                      | b                                 | a   | a   |     |     |     |  |  |  |
|             | L104   | GACCATTACCTGCCGTGCGAGCCAGGATG<br>TT THY KGG THY<br>GTCGCATGGTATCAGCAGAAACCA                      | b                                 | a   | b   |     |     |     |  |  |  |
|             | L105   | GACCATTACCTGCCGTGCGAGCCAGGATG<br>TT KGG THY THY<br>GTCGCATGGTATCAGCAGAAACCA                      | a                                 | b   | b   |     |     |     |  |  |  |
|             | L106   | GACCATTACCTGCCGTGCGAGCCAGGATG<br>TT KGG THY KGG<br>GTCGCATGGTATCAGCAGAAACCA                      | a                                 | b   | a   |     |     |     |  |  |  |
|             | L107   | GACCATTACCTGCCGTGCGAGCCAGGATG<br>TT KGG KGG KGG<br>GTCGCATGGTATCAGCAGAAACCA                      | a                                 | a   | a   |     |     |     |  |  |  |
|             | L108   | GACCATTACCTGCCGTGCGAGCCAGGATG<br>TT KGG KGG THY<br>GTCGCATGGTATCAGCAGAAACCA                      | a                                 | a   | b   |     |     |     |  |  |  |
|             | L109   | GACCATTACCTGCCGTGCGAGCCAGGATG<br>TT RRY RRY RRY<br>GTCGCATGGTATCAGCAGAAACCA                      | d                                 | d   | d   |     |     |     |  |  |  |
|             |        | GGCAAAGCGCCGAAACTTCTGATA <u>TAC</u><br><u>TCT GCG TCC TTC</u><br>CTGTATAGCGGCGTGCCGTCGCGTTTTTCG  | Y49                               | S50 | A51 | S52 | F53 |     |  |  |  |
|             | L201   | GGCAAAGCGCCGAAACTTCTGATA THY<br>THY NCN VSY THY<br>CTGTATAGCGGCGTGCCGTCGCGTTTTTCG                | b                                 | b   | p   | e   | b   |     |  |  |  |
|             | L202   | GGCAAAGCGCCGAAACTTCTGATA THY<br>THY NCN VSY KGG<br>CTGTATAGCGGCGTGCCGTCGCGTTTTTCG                | b                                 | b   | p   | e   | a   |     |  |  |  |
|             | L203   | GGCAAAGCGCCGAAACTTCTGATA THY<br>KGG NCN VSY KGG<br>CTGTATAGCGGCGTGCCGTCGCGTTTTTCG                | b                                 | a   | p   | e   | a   |     |  |  |  |
|             | L204   | GGCAAAGCGCCGAAACTTCTGATA THY<br>KGG NCN VSY KGG<br>CTGTATAGCGGCGTGCCGTCGCGTTTTTCG                | b                                 | b   | p   | e   | b   |     |  |  |  |
|             |        | GATTTTGCACCTACTACTGTCAACAG <u>CAT</u><br><u>TAT ACC ACA CCG CCG</u><br>ACCTTCGGTCAAGGCACCAAAGTGG | H91                               | Y92 | T93 | T94 | P95 | P96 |  |  |  |

|      |                                                                                                                                                    |         |     |         |          |     |     |         |         |         |         |  |  |  |  |  |  |  |  |
|------|----------------------------------------------------------------------------------------------------------------------------------------------------|---------|-----|---------|----------|-----|-----|---------|---------|---------|---------|--|--|--|--|--|--|--|--|
| L301 | GATTTTGCACCTACTACTGTCAACAG THY<br>THY RRY THY CCG NTN<br>ACCTTCGGTCAAGGCACCAAAGTGG                                                                 | b       | b   | d       | b        | P   | z   |         |         |         |         |  |  |  |  |  |  |  |  |
| L302 | GATTTTGCACCTACTACTGTCAACAG THY<br>THY RRY KGG CCG NTN<br>ACCTTCGGTCAAGGCACCAAAGTGG                                                                 | b       | b   | d       | a        | P   | z   |         |         |         |         |  |  |  |  |  |  |  |  |
| L303 | GATTTTGCACCTACTACTGTCAACAG THY<br>KGG RRY KGG CCG NTN<br>ACCTTCGGTCAAGGCACCAAAGTGG                                                                 | b       | a   | d       | a        | P   | z   |         |         |         |         |  |  |  |  |  |  |  |  |
| L304 | GATTTTGCACCTACTACTGTCAACAG THY<br>KGG RRY THY CCG NTN<br>ACCTTCGGTCAAGGCACCAAAGTGG                                                                 | b       | a   | d       | b        | P   | z   |         |         |         |         |  |  |  |  |  |  |  |  |
| L305 | GATTTTGCACCTACTACTGTCAACAG KGG<br>THY RRY THY CCG NTN<br>ACCTTCGGTCAAGGCACCAAAGTGG                                                                 | a       | b   | d       | b        | P   | z   |         |         |         |         |  |  |  |  |  |  |  |  |
| L306 | GATTTTGCACCTACTACTGTCAACAG KGG<br>THY RRY KGG CCG NTN<br>ACCTTCGGTCAAGGCACCAAAGTGG                                                                 | a       | b   | d       | a        | P   | z   |         |         |         |         |  |  |  |  |  |  |  |  |
| L307 | GATTTTGCACCTACTACTGTCAACAG KGG<br>KGG RRY KGG CCG NTN<br>ACCTTCGGTCAAGGCACCAAAGTGG                                                                 | a       | a   | d       | a        | P   | z   |         |         |         |         |  |  |  |  |  |  |  |  |
| L308 | GATTTTGCACCTACTACTGTCAACAG KGG<br>KGG RRY THY CCG NTN<br>ACCTTCGGTCAAGGCACCAAAGTGG                                                                 | a       | a   | d       | b        | P   | z   |         |         |         |         |  |  |  |  |  |  |  |  |
|      | GAGCTGTGCGGCGAGCGGTTCCACCATT<br><u>AGC GAT TAC TGG</u><br>ATTCATTGGGTGCGTCAAGCTCCCG                                                                | S3<br>0 | D31 | Y3<br>2 | W3<br>3  |     |     |         |         |         |         |  |  |  |  |  |  |  |  |
| H101 | GAGCTGTGCGGCGAGCGGTTCCACCATT<br>RRY RRY THY THY<br>ATTCATTGGGTGCGTCAAGCTCCCG                                                                       | d       | d   | b       | b        |     |     |         |         |         |         |  |  |  |  |  |  |  |  |
| H102 | GAGCTGTGCGGCGAGCGGTTCCACCATT<br>RRY RRY THY KGG<br>ATTCATTGGGTGCGTCAAGCTCCCG                                                                       | d       | d   | b       | a        |     |     |         |         |         |         |  |  |  |  |  |  |  |  |
| H103 | GAGCTGTGCGGCGAGCGGTTCCACCATT<br>RRY RRY KGG THY<br>ATTCATTGGGTGCGTCAAGCTCCCG                                                                       | d       | d   | a       | b        |     |     |         |         |         |         |  |  |  |  |  |  |  |  |
| H104 | GAGCTGTGCGGCGAGCGGTTCCACCATT<br>RRY RRY KGG KGG<br>ATTCATTGGGTGCGTCAAGCTCCCG                                                                       | d       | d   | a       | a        |     |     |         |         |         |         |  |  |  |  |  |  |  |  |
|      | GCAAGGGGCTGGAGTGGGTCGCG <u>GGC</u><br>ATT <u>ACG</u> CCC <u>GCT</u> <u>GGC</u> GGT <u>TAC</u> ACA <u>TAT</u><br>TATGCCGACAGCGTAAAGGTGCGTTTACG<br>A | G50     | I51 | T52     | P52<br>A | A53 | G54 | G5<br>5 | Y5<br>6 | T5<br>7 | Y5<br>8 |  |  |  |  |  |  |  |  |
| H201 | GCAAGGGGCTGGAGTGGGTCGCG KGG<br>ATT KGG CCC THY KGG GGT THY ACA THY<br>TATGCCGACAGCGTAAAGGTGCGTTTACG<br>A                                           | a       | l   | a       | P        | b   | a   | G       | b       | T       | b       |  |  |  |  |  |  |  |  |
| H202 | GCAAGGGGCTGGAGTGGGTCGCG THY<br>ATT KGG CCC THY KGG GGT THY ACA THY<br>TATGCCGACAGCGTAAAGGTGCGTTTACG<br>A                                           | b       | l   | a       | P        | b   | a   | G       | b       | T       | b       |  |  |  |  |  |  |  |  |

<sup>a</sup> Codons for mutagenized residues at CDR regions are underlined; DNA degeneracies are represented by IUB code (N = A/T/G/C, H = A/C/T, V = A/C/G, K = G/T, R = A/G, S = G/C, W = A/T, and Y = C/T).

<sup>b</sup> Residues are in Kabat number. Symbols used: a, W/G; b, F/S/Y; d, G/D/S/N; e, G/A/S/T/R/P; p, A/T/P/S; q, F/Y/D/V/N/I/H/L; z, L/I/V/F/M.

**Supplementary Table S2. Summary of CDR-H3 designs for GH2-5~24 phage-displayed synthetic scFv libraries.**

| Library name | Sequence designs                                                                                                                                                                                                           |
|--------------|----------------------------------------------------------------------------------------------------------------------------------------------------------------------------------------------------------------------------|
| GH2-5        | <b>AwayY</b><br><b>AwbyY</b>                                                                                                                                                                                               |
| GH2-6        | <b>AwabyY</b><br><b>AwbayY</b>                                                                                                                                                                                             |
| GH2-7        | <b>AwabbyY</b><br><b>AwbabyY</b><br><b>AwbbayY</b>                                                                                                                                                                         |
| GH2-8        | <b>AwababyY</b><br><b>AwabbayY</b><br><b>AwbabayY</b>                                                                                                                                                                      |
| GH2-9        | <b>ARabbabDY</b><br><b>ARabbbaDY</b><br><b>ARbabbaDY</b>                                                                                                                                                                   |
| GH2-10       | <b>ARabbabbDY</b><br><b>ARabbbabDY</b><br><b>ARabbbbbaDY</b><br><b>ARbababbDY</b><br><b>ARbabbbbaDY</b><br><b>ARbbabbbaDY</b>                                                                                              |
| GH2-11       | <b>ARabbabbbDY</b><br><b>ARabbbabbbDY</b><br><b>ARabbbbbaDY</b><br><b>ARabbbbbaDY</b><br><b>ARbababbDY</b><br><b>ARbabbbabDY</b><br><b>ARbabbbbbaDY</b><br><b>ARbbabbabDY</b><br><b>ARbbabbbaDY</b><br><b>ARbbbabbbaDY</b> |
| GH2-12       | <b>ARFqsttsqMDY</b>                                                                                                                                                                                                        |
| GH2-13       | <b>ARFqqqqqaMDY</b><br><b>ARFqqqqqqaMDY</b><br><b>ARFqqqaqqqMDY</b>                                                                                                                                                        |

|        |                                                                                                                                                                                                                                                                                                                                                                                                                                                                                       |
|--------|---------------------------------------------------------------------------------------------------------------------------------------------------------------------------------------------------------------------------------------------------------------------------------------------------------------------------------------------------------------------------------------------------------------------------------------------------------------------------------------|
|        | <p>ARF<b>qqaqqqa</b>MDY<br/> ARF<b>qaqqqqa</b>MDY<br/> ARF<b>aqqqqqa</b>MDY<br/> ARF<b>qqqqaqa</b>MDY<br/> ARF<b>qqqaqaq</b>MDY<br/> ARF<b>qqaqqaq</b>MDY<br/> ARF<b>qaqqqaq</b>MDY<br/> ARF<b>aqqqqaq</b>MDY<br/> ARF<b>qqqaaqq</b>MDY<br/> ARF<b>qqaqaqq</b>MDY<br/> ARF<b>qaqqaqq</b>MDY<br/> ARF<b>aqqqaqq</b>MDY<br/> ARF<b>qqaqqqq</b>MDY<br/> ARF<b>qaqaqqq</b>MDY<br/> ARF<b>aqqaqqq</b>MDY<br/> ARF<b>qaaqqqq</b>MDY<br/> ARF<b>aqaqqqq</b>MDY<br/> ARF<b>aaqqqqq</b>MDY</p> |
| GH2-14 | <p>ARF<b>qststtsq</b>MDY<br/> ARF<b>qstttsq</b>MDY</p>                                                                                                                                                                                                                                                                                                                                                                                                                                |
| GH2-16 | <p>ARF<b>qsysttsysq</b>MDY<br/> ARF<b>qsytsttysq</b>MDY<br/> ARF<b>qsyttstysq</b>MDY</p>                                                                                                                                                                                                                                                                                                                                                                                              |
| GH2-18 | <p>ARF<b>qsysttttsysq</b>MDY<br/> ARF<b>qsyysttsyysq</b>MDY<br/> ARF<b>qsyytsttyysq</b>MDY<br/> ARF<b>qsyyttstyysq</b>MDY</p>                                                                                                                                                                                                                                                                                                                                                         |
| GH2-20 | <p>ARF<b>qsysyttttsysq</b>MDY<br/> ARF<b>qsyysttttsyysq</b>MDY<br/> ARF<b>qsyyysttsyyysq</b>MDY<br/> ARF<b>qsyyytsttyyysq</b>MDY<br/> ARF<b>qsyyyttstyysq</b>MDY</p>                                                                                                                                                                                                                                                                                                                  |
| GH2-22 | <p>ARF<b>qsysyyttttsyysq</b>MDY<br/> ARF<b>qsyyysttttsyysq</b>MDY<br/> ARF<b>qsyyysttttsyyysq</b>MDY<br/> ARF<b>qsyyyysttsyyyysq</b>MDY<br/> ARF<b>qsyyyytsttyyysq</b>MDY</p>                                                                                                                                                                                                                                                                                                         |



|          |                                                                                                                                                                                                 |
|----------|-------------------------------------------------------------------------------------------------------------------------------------------------------------------------------------------------|
|          | ARFqsyyyyttstyyyysqMDY                                                                                                                                                                          |
| GH2-24   | ARFqsysyyyttttyyysysqMDY<br>ARFqsyyssyyttttyysyysqMDY<br>ARFqsyyyysttttysyyyysqMDY<br>ARFqsyyyysttttsyyyysqMDY<br>ARFqsyyyyysttsyyyysqMDY<br>ARFqsyyyyytsttyyyysqMDY<br>ARFqsyyyyytsttyyyysqMDY |
|          | Encoded amino acid types                                                                                                                                                                        |
| <i>a</i> | WG                                                                                                                                                                                              |
| <i>b</i> | FSY                                                                                                                                                                                             |
| <i>q</i> | FYDVNIHL                                                                                                                                                                                        |
| <i>w</i> | RGW                                                                                                                                                                                             |
| <i>y</i> | NDYH                                                                                                                                                                                            |
| <i>s</i> | GS                                                                                                                                                                                              |
| <i>t</i> | YS                                                                                                                                                                                              |

**Supplementary Table S3. CDR sequences of anti-influenza IgGs derived from synthetic antibody libraries**

| Antibody | CDR L1          | CDR L2   | CDR L3    | CDR H1                | CDR H2      | CDR H3                         | Library |
|----------|-----------------|----------|-----------|-----------------------|-------------|--------------------------------|---------|
| F10      | TGNSNNVGNQGAA   | YRNDRPS  | STWDSLSAV | TSSEVTFSSFAIS         | GISPMFGTPN  | ARSPSYICSGGTCVFDH              |         |
| FI6V3    | KSSQSVTFNYKNYLA | YWASTRES | QQHYRTPP  | AASGFTFSTYAMH         | VISYDANYKY  | AKDSQLRSLLYFEWLSQGYFDY         |         |
| C05      | QASQDIRKFLN     | YDASNLQR | QQYDGLPF  | VSGSSFGESTLSY<br>YAVS | IINAGGGDID  | AKHMSMQQVVSAGWERADLV<br>GDAFDV |         |
| CR8020   | RASQSVSMNYLA    | YGASRRAT | QQYGTSPR  | KASGYTFTSFGVS         | WISAYNGDTY  | AREPPLFYSSWSLDN                |         |
| Do1      | RASQDVWGGVA     | FFSRYLYS | QQYYNGPL  | AASGFTIDNGSIH         | WIGPYGGFTS  | ARFYGSGSSSFMDY                 | GH2-14  |
| P01      | RASQDVGWYVA     | YGSTFLYS | QQYYDSPL  | AASGFTIGDGSIH         | WIGPYGGSTF  | ARFFWGINMDY                    | GH2-11  |
| P03      | RASQDVWGYVA     | SWSGSLYS | QQYYNWPV  | AASGFTIDSFGIH         | FIGPFGGSTF  | ARFDSNSYSYHGIMDY               | GH2-16  |
| P04      | RASQDVNGSVA     | SSSASLYS | QQGWSYPL  | AASGFTINSWSIH         | SIWPFGGFTF  | ARGYSSFGDY                     | GH2-10  |
| P05      | RASQDVGSSVA     | SSSPYLYS | QQYYDYPL  | AASGFTINDYGIH         | GIWPLYWGTTF | ARFHGSSYSYVMDY                 | GH2-14  |
| P06      | RASQDVGGGVA     | SGTSGLYS | QQSSNFPI  | AASGFTIGGYWIH         | GIGPYWGSTY  | ARFNWFWNVMDY                   | GH2-13  |
| P10      | RASQDVNSNVA     | YWAGYLYS | QQSSDFPI  | AASGFTIDNSWIH         | SIWPFGGYTY  | ARFGNVFDWYMDY                  | GH2-13  |
| P11      | RASQDVNNVA      | SYASWLYS | QQSSGGPV  | AASGFTISSFWIH         | GIGPFWGSTF  | ARFNDWFYHGMDY                  | GH2-13  |
| P12      | RASQDVGYWVA     | YWTSGLYS | QQYSNWPI  | AASGFTIGDYIYI         | GIGPSWGSTS  | ARFYNNHWGFMDY                  | GH2-13  |
| P14      | RASQDVGFYVA     | SWSSYLYS | QQYYNYPL  | AASGFTIGDFGIH         | GIWPFGGYTY  | ARFVNWDGDYMDY                  | GH2-13  |
| P25      | RASQDVWGYVA     | SGSRLYS  | QQYYNYPI  | AASGFTISNGGIH         | GIGPYGGYTY  | ARFYGYSGIMDY                   | GH2-12  |
| P26      | RASQDVWVGVA     | YGTTYLYS | QQYYSFLL  | AASGFTIDNSWIH         | SIGPYWGYTS  | ARFVFFLPYAMDY                  | GH2-13  |
| P28      | RASQDVWYSVA     | YFATGLYS | QQYFNWPV  | AASGFTINNSGIH         | SIWPSGGYTY  | ARFNSSYSGLMDY                  | GH2-14  |
| P37      | RASQDVGNVA      | SSARGLYS | QQYYNFPI  | AASGFTFNSWGIH         | GIWPLYWGTTY | ARFHGSSYSYVMDY                 | GH2-14  |
| P38      | RASQDVWGYVA     | SWPGLYS  | QQYSSFPL  | AASGFTINDGGIH         | FIGPYGGSTF  | AGFIGDYSSYHGVMY                | GH2-16  |
| P44      | RASQDVNNVA      | YWSSSLYS | QQYYNFPV  | AASGFTIDGWWIH         | GIWPFGGFTS  | ARSYSGYSGDY                    | GH2-11  |
| P47      | RASQDVYYYVA     | SGSSYLYS | QQYYNWPL  | AASGFTIGNSGIH         | SIWPSGGSTY  | ARFGHIDGDIMDY                  | GH2-13  |
| P48      | RASQDVWSYVA     | SYTSYLYS | QQYFNWPI  | AASGFTINNSWGIH        | GIGPSWGYTS  | ARFGDGFDFLMDY                  | GH2-13  |
| P58      | RASQDVYSYVA     | SSSRGLYS | QQYSSFPI  | AASGFTIGGGGIH         | WIWPLYWGYTY | ARFNSSYSYVMDY                  | GH2-14  |
| S01      | RASQDVWGYVA     | SFPSSLYS | QQYYDGPV  | AASGFTINNYGIH         | SIWPSGGYTS  | ARFGLGDYDIMDY                  | GH2-13  |
| S06      | RASQDVSSWVA     | YGTTFLHS | QQYYNGPL  | AASGFTIGGGWIH         | FIGPYGGSTF  | ARFNFGFWNHMDY                  | GH2-13  |
| S07      | RASQDVWGYVA     | SYASFLYS | QQYFNWPV  | AASGFTINNSGIH         | SIGPSWGSTY  | ARFGIGDIDVMDY                  | GH2-13  |
| S10      | RASQDVSSYVA     | FWSTFLYS | QQYYDSPM  | AASGFTIGGYGIH         | SIGPSWGFTF  | ARFNWVINGVTDY                  | GH2-13  |
| S11      | RASQDVSSWVA     | YSSFLYS  | QQYYNGPL  | AASGFTIDNGGIH         | WIGPYGGSTS  | ARFGFGLHDLMDY                  | GH2-13  |
| S29      | RASQDVFGGVA     | YWSSWLYS | QQYYDGPI  | AASGFTISDYWIH         | SIWPSGGYTY  | ARFNWIVGHYMDY                  | GH2-13  |
| S40      | RASQDVGFYVA     | SWSSYLYS | QQYYNYPL  | AASGFTIGDFGIH         | GIWPFGGYTY  | ARFVNWDGDYMDY                  | GH2-13  |
| S45      | RASQDVGWVA      | YGARFLYS | QQYFNGPL  | AASGFTINGSSIH         | YIGPFGGSTY  | ARFWHGYNLYMDY                  | GH2-13  |
| S48      | RASQDVGWVA      | YGTRWLYS | QQYYSGPI  | AVSGFTIGDGSIH         | SIGPYGGSTY  | ARFHYGYWNNMDY                  | GH2-13  |
| S51      | RASQDVWGYVA     | SYTTYLYS | QQYYNSPV  | AASGFTIDDWGIH         | WIWPYGGFTS  | ARFGFVDWNLMDY                  | GH2-13  |

**Supplementary Table S4. Protein expression, epitope grouping and assessment of the neutralizing and binding potencies of anti-influenza IgGs derived from synthetic antibody libraries.**

| Name   | Yield (mg/L) | Epitope Grouping | EC <sub>50</sub> of ELISA binding (EC <sub>50</sub> (ng/ml) (correlation coefficient)) |                  |                  |               | EC <sub>50</sub> of cell surface binding (EC <sub>50</sub> (ng/ml) (max. MFI)) |               |               | IC <sub>50</sub> of true virus neutralization (ng/ml) | IC <sub>50</sub> of pseudo virus neutralization (ng/ml) |                    |                    |                    |
|--------|--------------|------------------|----------------------------------------------------------------------------------------|------------------|------------------|---------------|--------------------------------------------------------------------------------|---------------|---------------|-------------------------------------------------------|---------------------------------------------------------|--------------------|--------------------|--------------------|
|        |              |                  | H1N1 CA/09 HA                                                                          | H3N2 WN/05 HA    | H5N1 VN/04 HA    | H7N9 AH/13 HA | H1N1 CA/09 HA                                                                  | H3N2 WN/05 HA | H5N1 VN/04 HA |                                                       | H1N1 CA/09                                              | H1N1 CA/09         | H3N2 WN/05         | H5N1 VN/04         |
| F10    | 5.68         | I                | 12.15 (0.96)                                                                           | NB               | 20.98 (0.94)     | NB            | 1051 (9527)                                                                    | NB (220)      | 590 (10535)   | 1256.98                                               | 11.9                                                    | ND                 | 12                 | >2×10 <sup>5</sup> |
| FI6V3  | 9.87         | I                | 10.68 (0.96)                                                                           | 78.93 (0.92)     | 6.48 (0.92)      | 313.63 (0.95) | 67 (10125)                                                                     | 65 (16583)    | 610 (13712)   | 9214.55                                               | 21.3                                                    | ND                 | 13                 | 51                 |
| C05    | 3.48         |                  | NB                                                                                     | 8.44 (0.95)      | NB               | NB            | NB (86)                                                                        | 130 (14588)   | NB (547)      | >5×10 <sup>5</sup>                                    | >10 <sup>5</sup>                                        | 10.17              | >2×10 <sup>5</sup> | >2×10 <sup>5</sup> |
| CR8020 | 1.80         |                  | NB                                                                                     | 19.37 (0.97)     | NB               | 68.99 (0.92)  | NB (91)                                                                        | 569 (18011)   | NB (639)      | >5×10 <sup>5</sup>                                    | >10 <sup>5</sup>                                        | 47.66              | >2×10 <sup>5</sup> | 52                 |
| Do1    | 9.15         |                  | NB                                                                                     | NB               | >10 <sup>4</sup> | NB            | NB (228)                                                                       | NB (278)      | NB (313)      | >5×10 <sup>5</sup>                                    | >10 <sup>5</sup>                                        | >2×10 <sup>4</sup> | >2×10 <sup>5</sup> | >2×10 <sup>5</sup> |
| P01    | 12.60        | II               | 54.47 (0.94)                                                                           | NB               | 185.09 (0.96)    | NB            | 5900 (3668)                                                                    | NB (342)      | 5940 (1195)   | >5×10 <sup>5</sup>                                    | >10 <sup>5</sup>                                        | >2×10 <sup>4</sup> | >2×10 <sup>5</sup> | >2×10 <sup>5</sup> |
| P03    | 13.23        | III              | 15.61 (0.96)                                                                           | >10 <sup>4</sup> | >10 <sup>4</sup> | NB            | 494 (6022)                                                                     | NB (147)      | NB (216)      | >5×10 <sup>5</sup>                                    | >10 <sup>5</sup>                                        | >2×10 <sup>4</sup> | >2×10 <sup>5</sup> | >2×10 <sup>5</sup> |
| P04    | 9.50         | I                | 13.72 (0.97)                                                                           | NB               | >2000            | NB            | 1920 (6244)                                                                    | 3500 (2147)   | 3260 (1603)   | 62323                                                 | 146.3                                                   | >2×10 <sup>4</sup> | 185                | >2×10 <sup>5</sup> |
| P05    | 15.00        | I                | 16.50 (0.97)                                                                           | NB               | NB               | NB            | 2060 (7950)                                                                    | NB (176)      | 190 (1723)    | 289733                                                | 36.6                                                    | >2×10 <sup>4</sup> | >2×10 <sup>5</sup> | >2×10 <sup>5</sup> |
| P06    | 18.00        | I                | 5.59 (0.92)                                                                            | NB               | 238.05 (0.98)    | NB            | 1560 (11619)                                                                   | NB (250)      | 260 (1356)    | 135818                                                | 135.9                                                   | >2×10 <sup>4</sup> | 1256               | >2×10 <sup>5</sup> |
| P10    | 4.93         | I                | 17.40 (0.97)                                                                           | NB               | NB               | NB            | 410 (9663)                                                                     | NB (117)      | NB (517)      | >5×10 <sup>5</sup>                                    | 464.9                                                   | >2×10 <sup>4</sup> | >2×10 <sup>5</sup> | >2×10 <sup>5</sup> |
| P11    | 23.40        | I                | 29.22 (0.95)                                                                           | NB               | >10 <sup>4</sup> | NB            | 300 (8164)                                                                     | NB (303)      | 2420 (924)    | 953155                                                | 104                                                     | >2×10 <sup>4</sup> | 9293.78            | >2×10 <sup>5</sup> |
| P12    | 12.38        | II               | 54.94 (0.94)                                                                           | >10 <sup>4</sup> | NB               | NB            | 5860 (1995)                                                                    | NB (209)      | 6540 (883)    | >5×10 <sup>5</sup>                                    | >10 <sup>5</sup>                                        | >2×10 <sup>4</sup> | >2×10 <sup>5</sup> | >2×10 <sup>5</sup> |
| P14    | 17.43        | III              | 11.71 (0.96)                                                                           | NB               | NB               | NB            | 125 (8337)                                                                     | NB (154)      | NB (328)      | 4393351                                               | >10 <sup>5</sup>                                        | >2×10 <sup>4</sup> | >2×10 <sup>5</sup> | >2×10 <sup>5</sup> |
| P25    | 6.13         | III              | 138.93 (0.95)                                                                          | NB               | NB               | NB            | 761 (2376)                                                                     | NB (152)      | NB (318)      | >5×10 <sup>5</sup>                                    | >10 <sup>5</sup>                                        | >2×10 <sup>4</sup> | >2×10 <sup>5</sup> | >2×10 <sup>5</sup> |
| P26    | 5.45         | I                | 11.91 (0.96)                                                                           | NB               | 26.55 (0.92)     | 75.05 (0.94)  | 2035 (8923)                                                                    | NB (120)      | 650 (6402)    | 29596                                                 | 549.3                                                   | >2×10 <sup>4</sup> | 85                 | >2×10 <sup>5</sup> |
| P28    | 13.70        | II               | 797.79 (0.91)                                                                          | NB               | NB               | NB            | NB (168)                                                                       | NB (127)      | NB (193)      | >5×10 <sup>5</sup>                                    | >10 <sup>5</sup>                                        | >2×10 <sup>4</sup> | >2×10 <sup>5</sup> | >2×10 <sup>5</sup> |
| P37    | 22.00        | I                | 235.68 (0.98)                                                                          | NB               | NB               | NB            | 420 (5028)                                                                     | NB (199)      | 1180 (644)    | >5×10 <sup>5</sup>                                    | 1674                                                    | >2×10 <sup>4</sup> | >2×10 <sup>5</sup> | >2×10 <sup>5</sup> |
| P38    | 22.40        | III              | 94.39 (0.96)                                                                           | NB               | NB               | NB            | 3160 (988)                                                                     | NB (137)      | NB (240)      | >5×10 <sup>5</sup>                                    | >10 <sup>5</sup>                                        | >2×10 <sup>4</sup> | >2×10 <sup>5</sup> | >2×10 <sup>5</sup> |
| P44    | 9.50         | II               | 15.03 (0.97)                                                                           | NB               | 100 (0.96)       | 162.86 (0.94) | 466 (8478)                                                                     | NB (127)      | NB (188)      | >5×10 <sup>5</sup>                                    | >10 <sup>5</sup>                                        | >2×10 <sup>4</sup> | >2×10 <sup>5</sup> | >2×10 <sup>5</sup> |
| P47    | 6.93         | III              | 9.62 (0.96)                                                                            | NB               | NB               | NB            | 610 (10241)                                                                    | NB (175)      | NB (396)      | >5×10 <sup>5</sup>                                    | >10 <sup>5</sup>                                        | >2×10 <sup>4</sup> | >2×10 <sup>5</sup> | >2×10 <sup>5</sup> |
| P48    | 2.80         | III              | 15.36 (0.97)                                                                           | NB               | NB               | NB            | 2400 (7865)                                                                    | NB (258)      | NB (474)      | >5×10 <sup>5</sup>                                    | >10 <sup>5</sup>                                        | >2×10 <sup>4</sup> | >2×10 <sup>5</sup> | >2×10 <sup>5</sup> |

|     |       |     |                 |    |                  |                  |                 |                |               |                    |                  |                    |                    |                    |
|-----|-------|-----|-----------------|----|------------------|------------------|-----------------|----------------|---------------|--------------------|------------------|--------------------|--------------------|--------------------|
| P58 | 0.90  | II  | 22.74<br>(0.96) | NB | >10 <sup>4</sup> | 503.58<br>(0.93) | 250<br>(6288)   | 3581<br>(697)  | 366<br>(6713) | >5×10 <sup>5</sup> | >10 <sup>5</sup> | >2×10 <sup>4</sup> | >2×10 <sup>5</sup> | >2×10 <sup>5</sup> |
| S01 | 9.65  | III | 12.18<br>(0.96) | NB | NB               | NB               | 384<br>(8428)   | NB<br>(178)    | NB<br>(306)   | >5×10 <sup>5</sup> | >10 <sup>5</sup> | >2×10 <sup>4</sup> | >2×10 <sup>5</sup> | >2×10 <sup>5</sup> |
| S06 | 9.48  | II  | 46.70<br>(0.97) | NB | 310.98<br>(0.97) | NB               | 3982<br>(1648)  | NB<br>(135)    | NB<br>(249)   | >5×10 <sup>5</sup> | >10 <sup>5</sup> | >2×10 <sup>4</sup> | >2×10 <sup>5</sup> | >2×10 <sup>5</sup> |
| S07 | 16.43 | III | 11.42<br>(0.96) | NB | NB               | NB               | 1610<br>(10791) | 3710<br>(410)  | 4980<br>(863) | >5×10 <sup>5</sup> | >10 <sup>5</sup> | >2×10 <sup>4</sup> | >2×10 <sup>5</sup> | >2×10 <sup>5</sup> |
| S10 | 3.45  | I   | 14.00<br>(0.97) | NB | 259.21<br>(0.97) | NB               | 3380<br>(10696) | 7860<br>(511)  | 790<br>(1099) | 1562813            | 349.1            | >2×10 <sup>4</sup> | 267                | >2×10 <sup>5</sup> |
| S11 | 16.98 | II  | 26.79<br>(0.98) | NB | 78.14<br>(0.90)  | NB               | 4070<br>(5600)  | NB<br>(207)    | NB<br>(434)   | >5×10 <sup>5</sup> | >10 <sup>5</sup> | >2×10 <sup>4</sup> | >2×10 <sup>5</sup> | >2×10 <sup>5</sup> |
| S29 | 18.18 | I   | 22.27<br>(0.98) | NB | >10 <sup>4</sup> | NB               | 4220<br>(6276)  | NB<br>(188)    | NB<br>(367)   | >5×10 <sup>5</sup> | 672.2            | >2×10 <sup>4</sup> | >2×10 <sup>5</sup> | >2×10 <sup>5</sup> |
| S40 | 24.05 | III | 16.32<br>(0.96) | NB | NB               | NB               | 460<br>(8626)   | NB<br>(109)    | 2850<br>(724) | 435924             | >10 <sup>5</sup> | >2×10 <sup>4</sup> | >2×10 <sup>5</sup> | >2×10 <sup>5</sup> |
| S45 | 16.68 | II  | 20.61<br>(0.96) | NB | 230.35<br>(0.97) | NB               | 4470<br>(2473)  | 15800<br>(529) | NB<br>(451)   | >5×10 <sup>5</sup> | >10 <sup>5</sup> | >2×10 <sup>4</sup> | >2×10 <sup>5</sup> | >2×10 <sup>5</sup> |
| S48 | 10.03 | II  | 12.50<br>(0.97) | NB | 73.75<br>(0.91)  | NB               | 4860<br>(6243)  | NB<br>(122)    | 1920<br>(875) | >5×10 <sup>5</sup> | >10 <sup>5</sup> | >2×10 <sup>4</sup> | >2×10 <sup>5</sup> | >2×10 <sup>5</sup> |
| S51 | 6.75  | III | 23.38<br>(0.96) | NB | NB               | NB               | 754<br>(6290)   | NB<br>(340)    | NB<br>(452)   | >5×10 <sup>5</sup> | >10 <sup>5</sup> | >2×10 <sup>4</sup> | >2×10 <sup>5</sup> | >2×10 <sup>5</sup> |

**Supplementary Table S5. Crystallography parameters for the S40-HA complex structure**

|                                                                        | HA1/S40-Fab                                                                          |
|------------------------------------------------------------------------|--------------------------------------------------------------------------------------|
| <b>Data collection</b>                                                 |                                                                                      |
| Wavelength (Å)                                                         | 0.9                                                                                  |
| Space group                                                            | <i>C2</i>                                                                            |
| Cell dimensions (Å)                                                    | <i>a</i> =200.40, <i>b</i> =133.64, <i>c</i> =133.14, $\alpha$ =90, $\beta$ =110.47, |
| Resolution (Å)                                                         | 25.0-3.35 (3.47-3.35)                                                                |
| Unique reflections                                                     | 47,477                                                                               |
| <i>R</i> <sub>merge</sub> (%)                                          | 9.6 (64.5)                                                                           |
| <i>I</i> / $\sigma$ ( <i>I</i> )                                       | 17.3 (2.4)                                                                           |
| Completeness                                                           | 99.6 (100.0)                                                                         |
| Redundancy                                                             | 4.6 (4.7)                                                                            |
| <b>Refinement</b>                                                      |                                                                                      |
| Resolution (Å)                                                         | 25.0-3.35                                                                            |
| No. of reflections <i>R</i> <sub>work</sub> / <i>R</i> <sub>free</sub> | 34,487/1,826                                                                         |
| <i>R</i> <sub>work</sub> / <i>R</i> <sub>free</sub>                    | 23.0/27.5                                                                            |
| No. of protein atoms/Avg B factor (Å <sup>2</sup> )                    | 11,100/176.1                                                                         |
| <b>RMSD</b>                                                            |                                                                                      |
| Bond lengths (Å) /Bond angles (°)                                      | 0.01/1.49                                                                            |
| <b>Ramachandran statistics (%)<sup>b</sup></b>                         |                                                                                      |
| Most favored                                                           | 75.0                                                                                 |
| Additionally allowed                                                   | 22.8                                                                                 |
| Generously allowed                                                     | 1.6                                                                                  |
| Disallowed                                                             | 0.6                                                                                  |

<sup>a</sup> Values corresponding to the highest resolution shells are shown in parentheses.

<sup>b</sup> Stereochemistry of the model was validated with PROCHECK.

## Reference:

- 1 Sidhu, S. S. & Weiss, G. A. in *Phage Display* (eds T. Clackson & H. B. Lowman) 27-41 (Oxford University Press, 2004).
- 2 Chen, H. S. *et al.* Predominant structural configuration of natural antibody repertoires enables potent antibody responses against protein antigens. *Scientific reports* **5**, 12411, doi:10.1038/srep12411 (2015).
- 3 Andris-Widhopf, J., Steinberger, P., Fuller, R., Rader, C. & Barbas, C. F., 3rd. Generation of human scFv antibody libraries: PCR amplification and assembly of light- and heavy-chain coding sequences. *Cold Spring Harb Protoc* **2011**, doi:2011/9/pdb.prot065573 [pii] 10.1101/pdb.prot065573 [doi] (2011).
- 4 Yu, C.-M. *et al.* Rationalization and Design of the Complementarity Determining Region Sequences in an Antibody-Antigen Recognition Interface. *PLoS ONE* **7**, e33340, doi:10.1371/journal.pone.0033340 (2012).
